1 **A quantitative fluorescence-based approach to study mitochondrial protein**

2 **import**

3

4 **Running title: Fluorescent Mitochondrial import assay**

5

6 Naintara Jain<sup>1</sup>, Ridhima Gomkale<sup>1</sup>, Olaf Bernhard<sup>1</sup>, Peter Rehling<sup>1,2,3,\*</sup>, Luis Daniel

7 Cruz-Zaragoza<sup>1</sup>

8

9 <sup>1</sup> Department of Cellular Biochemistry, University Medical Center Göttingen, 37073

10 Göttingen, Germany

11 <sup>2</sup> Cluster of Excellence "Multiscale Bioimaging: from Molecular Machines to Networks  
12 of Excitable Cells" (MBExC), University of Göttingen, Germany

13 <sup>3</sup> Max Planck Institute for Multidisciplinary Science, 37077 Göttingen, Germany

14

15 \* Corresponding author: [peter.rehling@medizin.uni-goettingen.de](mailto:peter.rehling@medizin.uni-goettingen.de)

16

17 (26996 characters including spaces)

18

19 **Abstract**

20 Mitochondria play central roles in cellular energy production and metabolism. Most of  
21 the proteins that are required to carry out these functions are synthesized in the cytosol  
22 and imported into mitochondria. A growing number of metabolic disorders arising from  
23 mitochondrial dysfunction can be traced to errors in mitochondrial protein import. The  
24 mechanisms underlying the import of precursor proteins are commonly studied by  
25 using radioactively-labeled precursor proteins, which are imported into purified  
26 mitochondria. Here, we establish a fluorescence-based import assay to analyze  
27 protein import into mitochondria. We show that fluorescently-labeled precursors  
28 enable import analysis with similar sensitivity to those using radioactive precursors,  
29 yet they provide the advantage of quantifying import with picomole resolution. We  
30 adapted the import assay to a 96-well plate format allowing for fast analysis in a  
31 screening-compatible format. Moreover, we show that fluorescently labeled  
32 precursors can be used to monitor the assembly of the F<sub>1</sub>F<sub>0</sub> ATP-synthase in purified  
33 mitochondria. Thus, we provide a sensitive fluorescence-based import assay that  
34 enables quantitative and fast-import analysis.

35

## 36 **Introduction**

37 Mitochondria play central roles in cellular metabolism and signaling processes  
38 (Nunnari & Suomalainen, 2012). While mitochondria possess a small genome, most  
39 mitochondrial proteins are nuclear encoded and imported after their synthesis in the  
40 cytosol (Pfanner *et al*, 2019; Richter-Dennerlein *et al*, 2015; Neupert & Herrmann,  
41 2007; Araiso *et al*, 2022). The mitochondrial proteome comprises of more than 1,000  
42 different proteins in the yeast *Saccharomyces cerevisiae* (Di Bartolomeo *et al*, 2020;  
43 Wiedemann & Pfanner, 2017; Morgenstern *et al*, 2017; Sickmann *et al*, 2003). The  
44 translocation of the precursor proteins across the outer and inner mitochondrial  
45 membranes requires multi-subunit protein translocation machineries in the  
46 membranes. The TOM (translocase of the outer membrane) complex facilitates  
47 translocation through the outer membrane while TIM (translocase of the inner  
48 membrane) complexes mediate translocation of precursors across the inner  
49 membrane (Lill & Neupert, 1996; Berthold *et al*, 1995; Wiedemann & Pfanner, 2017;  
50 Araiso *et al*, 2022). The majority of precursor proteins are directed across both  
51 membranes by N-terminal presequences, consisting of amphipathic alpha helices  
52 which are recognized by receptors in the TOM and TIM23 complex (Chacinska *et al*,  
53 2009; Geissler *et al*, 2002; Schulz *et al*, 2011; Yamano *et al*, 2007; Yamamoto *et al*,  
54 2009; Brix *et al*, 1997; Roise *et al*, 1986; Vögtle *et al*, 2009; Neupert & Herrmann,  
55 2007; Araiso *et al*, 2022). The import across the TIM23 complex into the matrix  
56 requires membrane potential across the inner membrane ( $\Delta\psi$ ) and the activity of the  
57 presequence translocase - associated motor (PAM) complex. Upon import into the  
58 matrix, the presequence is cleaved by the mitochondrial processing peptidase (MPP)  
59 (Schulz *et al*, 2015; Wiedemann & Pfanner, 2017; Mossmann *et al*, 2012).

60 Import into mitochondria is commonly studied by utilizing an *in vitro* import assay in  
61 which [<sup>35</sup>S]-labeled precursor proteins are imported post-translationally into isolated  
62 mitochondria (Harmey *et al*, 1977; Maccacchini *et al*, 1979). For this, radiolabeled  
63 precursors are synthesized in reticulocyte lysates and incubated with purified  
64 mitochondria. Dissipation of the membrane potential by inhibitors of the OXPHOS  
65 system and uncouplers is used to block import. A protease treatment of the reaction  
66 following import removes non-imported proteins from the system. Samples are  
67 analyzed by SDS- or BN-PAGE, and proteins are visualized by autoradiography. This  
68 *in vitro* import assay has been instrumental in dissecting the mechanisms of protein  
69 translocation across the mitochondrial membrane as it provides high sensitivity and  
70 kinetic resolution. However, absolute quantitative information on the imported  
71 amounts of precursors is difficult to obtain in this setup and the use of isotopes requires  
72 special safety precautions that are not readily available to all researchers. Moreover,  
73 the radioactive approach is difficult to combine with high-throughput screening  
74 approaches.

75 Here we report on a fluorescence-based method to monitor *in vitro* mitochondrial  
76 protein import using precursor-fluorophore fusion protein as a substrate. The non-  
77 radioactive method is sensitive, fast, and it allows to work with chemical quantities of  
78 import competent protein. The fluorescent approach provides the advantage of a fully  
79 quantitative output with picomolar resolution and the potential to perform import in a  
80 plate-format for rapid results. We show that, in addition to monitoring protein import,  
81 fluorescently-labeled proteins can also be utilized to analyze assembly of protein  
82 complexes in purified mitochondria.

## 84 **Results and discussion**

85

### 86 **Jac1<sub>488</sub> fluorescent precursor enables quantitative import analysis**

87 Based on a previous observation, that a fluorescently labeled precursor protein retains  
88 the ability to be imported into mitochondria (Cruz-Zaragoza *et al*, 2021), we set out to  
89 establish a non-radioactive standard import assay. For the initial set of experiments,  
90 constructs consisting of the *S. cerevisiae* Jac1 protein with its authentic N-terminal  
91 presequence fused to a C-terminal FLAG tag was used (Fig 1A). The Jac1 used here  
92 carried a C145A exchange and an additional cysteine residue at the C-terminal  
93 allowing for addition of a fluorophore. For purification of the construct from *E. coli*, the  
94 protein carried a His-tag, which was cleaved off post-purification through a flanking  
95 SUMO protease site, preserving the N-terminus of the protein. After purification, the  
96 Jac1 fusion-protein was modified by maleimide-mediated addition of a DyLight  
97 fluorophore to the terminal cysteine residue (Jac1<sub>488</sub>). Next, we imported the precursor  
98 into isolated mitochondria. Samples were split after the import reaction and treated  
99 with Proteinase K (PK) to remove non-imported precursor. As a negative control, the  
100 membrane potential was dissipated prior to import. Samples were subjected to SDS-  
101 PAGE and gels scanned at the DyLight fluorophore emission range using a  
102 fluorescence scanner (Fig 1B). The Jac1<sub>488</sub> precursor was imported into mitochondria  
103 in a time and membrane potential-dependent manner as apparent in the protease  
104 treated samples (Fig 1B). However, Jac1<sub>488</sub> did not display efficient processing upon  
105 import. Based on results from import assays of various other protein constructs tested  
106 during this study, this is not a general phenomenon observed for fluorescent  
107 precursors, but more specific to certain proteins and presequences. After confirming  
108 that the substrate imported efficiently into mitochondria, we aimed to obtain

109 quantitative data on the imported protein amounts. To this end, dilutions of the purified  
110 precursor protein were used as a standard and loaded together with the import  
111 samples on the gel (Fig 1C). A titration curve of the precursor standard was plotted to  
112 determine the absolute amount of imported protein per  $\mu\text{g}$  of mitochondria. We  
113 calculated that about 0.84 pmol protein was imported per  $\mu\text{g}$  mitochondria after 10 min  
114 and about 1.2 pmol after 15 min (Fig 1E). In this timeframe the import reaction was  
115 still in the linear range (Fig 1D). We concluded that fluorescently labeled precursors  
116 can be used for *in vitro* import and that the assay allowed us to obtain quantitative data  
117 on mitochondrial import. Accordingly, an absolute comparison between different  
118 substrates and import conditions can be obtained.

119

## 120 **Jac1<sub>488</sub> enables functional analysis of the import machinery**

121 *In vitro* import into mitochondria is the key technology to dissect the mechanisms and  
122 components of protein translocation. To assess if the fluorescently-labeled precursor  
123 could be used to analyze defects in protein transport, we imported Jac1<sub>488</sub> into purified  
124 yeast mitochondria with defects in the import machineries. Therefore, a temperature  
125 sensitive mutant of *Tim44* (*tim44-804*) and a yeast strain in which the *TIM50* gene was  
126 under control of a GAL-promotor, allowing to decrease steady state levels of Tim50,  
127 were selected (Geissler *et al*, 2002; Hutu *et al*, 2008). Tim50 is the essential, central  
128 presequence receptor of the TIM23 complex and required for precursor import  
129 (Geissler *et al*, 2002; Yamamoto *et al*, 2002; Schulz *et al*, 2011; Qian *et al*, 2011;  
130 Mokranjac *et al*, 2003). Mitochondria depleted for Tim50 were isolated from *S.*  
131 *cerevisiae* (Schulz *et al*, 2011) and steady state protein levels were analyzed to  
132 confirm efficient knockdown. While the Tim50 levels were reduced in the mutant strain,  
133 Tom70, Tim23, and Hsp70 levels remained similar to the wild-type (WT), indicating

134 that the remaining import machinery constituents were not affected by the knockdown  
135 (Fig 2A). Jac1<sub>488</sub> was imported into WT and Tim50-depleted mitochondria (Fig 2B). As  
136 expected, Jac1<sub>488</sub> import was severely affected in the mutant mitochondria, which  
137 amounted to about 40% of the WT import after 15 min (Fig 2C). The observed import  
138 defect matched the decrease in import observed with radioactively labeled Jac1 (Fig  
139 2D & E).

140 Tim44 is a constituent of the mitochondrial import motor and required for matrix  
141 protein transport (Schneider *et al*, 1994; Blom *et al*, 1993). We used a Tim44  
142 temperature-conditional yeast mutant strain (*tim44-804*), which displays an import  
143 defect upon shift of mitochondria to 37°C (Hutu *et al*, 2008). Western blot analysis of  
144 the protein steady state levels in *tim44-804* displayed slightly reduced amounts of  
145 Tim44 in mitochondria while other analyzed translocase constituents were not  
146 decreased in the mutant (Fig 2F). Import of Jac1<sub>488</sub> into WT and *tim44-804* mutant  
147 mitochondria showed a mutant-specific decrease in import (Fig 2G & H). It is  
148 interesting to note that the decrease in import was less pronounced when assayed  
149 using the radiolabeled Jac1 (Fig 2I & J). The increased import defect observed for the  
150 fluorescently-labeled precursor is possibly due to the larger quantities of precursor  
151 applied to mitochondria compared to the radiolabeled counterpart, which challenges  
152 the import machinery for translocation. It is also conceivable that chaperones that are  
153 associated to the radiolabeled precursor after synthesis in the reticulocyte lysate may  
154 stimulate the import by unfolding the precursor for import. In summary, these results  
155 confirm that import defects can be efficiently assayed using the fluorescently-labeled  
156 precursor.

157

158

## 159 **Effect of presequences swapping on import efficiency**

160 As a way to utilize this method to study different characteristics of a precursor, we  
161 synthesized Jac1 constructs with different targeting signals. For this, the authentic  
162 presequence of Jac1 was replaced with presequences of Idh1 (Isocitrate  
163 dehydrogenase 1) or Aco1 (Aconitase 1). These presequences were selected due to  
164 their similarity to the Jac1 presequence regarding length and charge ( $^{1-10}\text{Jac1}^{\text{ps}}$ , +2.26  
165 net charge;  $^{1-12}\text{Idh1}^{\text{ps}}$ , +2.27 net charge;  $^{1-16}\text{Aco1}^{\text{ps}}$ , +3.27 net charge) (Fig 3A). The  
166 same procedure was followed for purification and modification of these constructs as  
167 described above for the authentic Jac1. All constructs were modified with three  
168 different DyLight fluorophores (with excitation wavelengths 488, 680, and 800 nm),  
169 with the assumption that the modification should not affect import but allow to multiplex  
170 import using precursors with different fluorophores in the same sample (Fig 3B).  
171 Subsequently, all precursor constructs were imported into purified mitochondria using  
172 the Jac1<sub>488</sub> precursor as a control. After import, samples were analyzed by SDS-PAGE  
173 and the fluorescence signal of the imported proteins was quantified. All fusion proteins  
174 displayed membrane potential-dependent import that increased with time (Fig 3C &  
175 3E). Despite a slightly more positive charged and longer presequence in case of the  
176 Aco1, the import of the pAmJac1 (mature Jac1 protein with Aco1 presequence)  
177 showed no significant difference in import compared to the Jac1 control (Fig 3D).  
178 Similar to Jac1, the pAmJac1 variants did not display efficient processing after import  
179 (Fig 3C). In the import experiments, plmJac1 (mature Jac1 protein with Idh1  
180 presequence) precursor variants differed slightly compared to the control, despite the  
181 almost identical size and charge of the presequence (Fig 3F). However, upon import  
182 of plmJac1, we observed efficient processing of the Idh1 presequence (Fig 3E). These  
183 two examples showed that indeed the import of fluorescently labeled precursors



184 represents a means to analyze precursor properties for mitochondrial protein import.  
185 In addition, in both cases, the import of the constructs was not affected by the choice  
186 of fluorophore (Fig 3D & 3F). Accordingly, different combinations of fluorophores can  
187 be used to monitor import. Since there was no bleed-through of the fluorescence  
188 between different scanning channels, the use of differently labeled precursors will  
189 enable multiplexing of import assays using different precursors, tagged by different  
190 fluorophores.

191

### 192 **Assessing import in 96-well plate format**

193 While the current standard import assay requires separation of proteins by PAGE  
194 analysis to observe the labeled protein, we were curious if we could adapt the process  
195 to a plate format in which samples could be analyzed rapidly with a fluorescence plate  
196 reader. Therefore, we performed the import assay using the pAmJac1<sub>680</sub> precursor as  
197 described above and subsequently treated the mitochondria with proteinase K.  
198 Following import, mitochondria were re-isolated, resuspended, and transferred to 96-  
199 well plates (Fig 4A). For comparison, the import reactions were normally split and  
200 analyzed in a plate assay and by SDS-PAGE. To enable quantification, a dilution  
201 series of the precursor was measured as a standard (Fig 4B). Fluorescence  
202 measurements of pAmJac1<sub>680</sub> import reactions revealed a time-dependent localization  
203 of the construct to mitochondria (Fig 4C). The fluorescence measured in the  
204 membrane potential depleted sample was subtracted from the individual  
205 measurements to correct for background binding. A quantification of the plate assay  
206 showed that 0.06, 0.12, and 0.2 pmol of pAmJac1<sub>680</sub> protein were imported per  $\mu$ g  
207 mitochondria at 5, 10, and 15 minute time points respectively (Fig 4D). Accordingly, a  
208 plate-format is suitable to assess import of labeled precursors, which can be quantified

209 much faster compared to a gel-based system. A comparison between the results of  
210 the plate format and the standard PAGE analysis showed that both types of analysis  
211 provided similar data on the kinetics of the import reaction (Fig 4E). A quantitative  
212 comparison showed only a small divergence between the two approaches that can  
213 possibly be attributed to precursor fragments that are detected by total fluorescence  
214 but not resolved on the gel.

215         Next, we addressed if the plate format could be applied to analyze defects in  
216 mitochondrial import. For this we performed import into wild-type and Tim50-depleted  
217 mitochondria (Fig 4G). Similar import kinetics were apparent with both approaches  
218 and the magnitude of the mutant import defect was comparable. Accordingly, the  
219 analysis of import reactions by plate assay provided an efficient means for import  
220 studies. Yet, while the plate-format saves time and provides accurate readouts on  
221 import kinetics and efficiency, it cannot provide information on protein processing after  
222 import and can only give a value for the total imported, protease protected protein  
223 amounts.

224

### 225 **Fluorescent Atp5 enables analysis of complex assembly**

226 During the course of the study, we tested various protein-fluorophore fusion  
227 constructs. Among these was Atp5<sub>488</sub>, a subunit of the F<sub>1</sub>F<sub>0</sub> ATP-synthase, which  
228 displayed efficient processing comparable to that seen in the autoradiograph of import  
229 reactions using a radioactive Atp5 version (Fig 5A). The low background and strong  
230 signal suggested that it could be a good candidate for the 96-well plate import readout.  
231 Hence, we used this precursor to perform further import experiments and to  
232 corroborate the results with import of radioactive Atp5. We tested the dependence of  
233 Atp5 on the mitochondrial membrane potential for import using the uncoupler CCCP

234 (carbonyl cyanide-m-chlorophenylhydrazone) that allows the dissipation of the  $\Delta\Psi$  in  
235 a concentration dependent manner (Martin *et al*, 1991). To this end, we titrated  
236 increasing amounts of CCCP and analyzed protein import into mitochondria. We  
237 observed that the amount of mature Atp5<sub>488</sub> decreased with increasing CCCP  
238 concentration (Fig 5B). We compared the decrease of import with increasing CCCP  
239 concentrations between the fluorescent Atp5<sub>488</sub> protein quantified using a gel system  
240 and a 96-well plate format (Fig 5B & C) and [<sup>35</sup>S]Atp5 analyzed by autoradiography  
241 (Fig 5D & E). In all three cases a similar  $\Delta\Psi$ -dependence of the import was observed  
242 supporting the usefulness of the fluorescence approach for analyzing the  
243 bioenergetics of protein import.

244 The availability of a subunit of an OXPHOS complex suitable for protein import  
245 led us to ask if a fluorescence import approach was appropriate for the analysis of  
246 OXPHOS complex assembly. To address this, we purified mitochondria from an  
247 *atp21* $\Delta$  strain which lacks the ability to form complex V dimers, as can be analyzed by  
248 Blue Native PAGE (Fig 5F, lanes 1-2). Radiolabeled Atp5 and Atp5<sub>488</sub> efficiently  
249 assembled into monomeric and dimeric ATP synthase in wild-type mitochondria in a  
250 membrane potential-dependent manner. In *atp21* $\Delta$  mutant mitochondria both proteins  
251 only assembled into the monomeric ATP synthase as these mitochondria lack the  
252 dimeric form (Fig 5G). Accordingly, OXPHOS protein complex assembly can be  
253 studied with a fluorescent fusion protein. The non-radioactive approach provides  
254 similar information and sensitivity as the radioactive assay.

255

256

## 257 **Conclusion**

258 Here, we present a new approach to study protein import into mitochondria. The  
259 commonly used method in the field is the synthesis of precursor proteins by *in vitro*  
260 translation using radioactive labeling for detection after protein or protein complex  
261 separation by PAGE analysis. Yet, the use of radioactive substances is problematic  
262 for many labs due to safety considerations related to the technique. Different  
263 approaches have been previously attempted to address protein import with non-  
264 radioactive strategies. In principle the use of recombinant proteins is established and  
265 has the advantage of providing import substrates in chemical and translocase  
266 saturating quantities with western blot-based detection (Voos et al., 1993; Mokranjac  
267 et al., 2005; Schulz & Rehling, 2014). In a recent study, Pereira et al. (2019)  
268 established an approach utilizing a bipartite luminescence system that employs  
269 NanoBiT – a split luciferase – to monitor protein import. Yet, this approach requires  
270 the introduction of one of the components in advance of the import assay into  
271 mitochondria making it less flexible to use in a mutant context. Here, we provide a  
272 non-radioactive alternative that is based on the use of fluorescently-labeled proteins  
273 and that is complementary to the existing strategies, filling the analytic gaps of the  
274 existing techniques. Chemical modification with fluorescent dyes allows the use of gel  
275 based and multi-well plate-based approaches. Moreover, as the absolute amounts of  
276 precursors can be determined, it is possible to easily assess the protein import in  
277 quantitative terms. Finally, the in-gel and in 96-well format offer a faster detection  
278 mode than radioactive assay. Beyond these applications, we show that after the  
279 fluorescently-labeled protein import, it can assemble into its target complex. Hence,  
280 the *in vitro* import system allows analysis of assembly processes in similar manner as  
281 with radiolabeled proteins and broadens the scope of non-radioactive approaches.

## 282 **Material and methods**

### 283 **Plasmid generation for protein expression in bacteria**

284 For the production of recombinant Jac1-FLAG-Cys, a plasmid reported previously was  
285 used (Cruz-Zaragoza *et al* 2021) where Jac1 is tagged at the N-terminus with a His<sub>14</sub>-  
286 SUMO-tag. To swap the Jac1 presequence, the sequence encoding presequences of  
287 *Saccharomyces cerevisiae* Aco1 and Idh1 were added by PCR at the 5' of Jac1 ORF,  
288 removing the Jac1 presequence, followed by Gibson assembly. *ATP5* gene was  
289 amplified from *S.cerevisiae* genomic DNA and ligated into pJET vector using  
290 CloneJET PCR Cloning kit (Thermo Scientific). Site-directed mutagenesis was used  
291 to recode the cysteine at position 117 to alanine. The expression vector was amplified  
292 by PCR while removing Jac1 ORF but preserving FLAG-tag and C-terminal cysteine  
293 coding sequence. Finally, the mutant ORF was amplified by PCR and inserted in frame  
294 after the His<sub>14</sub>-SUMO-tag sequence from the amplified vector to generate a plasmid  
295 for the expression of His<sub>14</sub>-SUMO-Atp5<sup>C117A</sup>-FLAG-Cys.

296

### 297 **Recombinant protein expression and purification**

298 Recombinant Jac1, its variants with different presequences (pAmJac1 and plmJac1)  
299 and Atp5<sup>C117A</sup> were purified as follows. Plasmids were transformed into *Escherichia*  
300 *coli* BL21 Tuner (DE3) strain (Sigma-Aldrich) or Rossetta DE3 (Novagen) in case of  
301 Atp5<sup>C117A</sup>. One colony was inoculated into LB medium supplemented with 2% glucose  
302 and 50 µg/mL kanamycin. The preculture was incubated for eight hours at 30°C. The  
303 OD<sub>600nm</sub> was determined and fresh medium was inoculated at initial OD<sub>600nm</sub>=0.1 and  
304 incubated overnight at 37°C. Next, the preculture was diluted in LB medium  
305 supplemented with 50 µg/mL kanamycin to OD<sub>600nm</sub>=0.05. The culture was incubated

306 at 37°C until the OD<sub>600nm</sub> reached 0.6-0.8. Protein expression was induced with 0.2  
307 mM IPTG and incubated for five hours. Cells were harvested and kept at -80°C. Cells  
308 were resuspended in lysis buffer (40 mM Tris/HCl, 500 mM NaCl, 10 mM Imidazole, 1  
309 mM PMSF, 0.2 mg/mL DNase1, 1x complete protease inhibitor cocktail (Roche), pH  
310 7.4). Cell disruption was performed with an EmulsiFlex-C3 (AVESTIN). The lysate was  
311 cleared by centrifugation in an SS-34 rotor at 23,000 x g at 4°C for 60 minutes. Next,  
312 the supernatant was collected and injected in two HisTrap columns (Cytiva) in tandem  
313 pre-equilibrated in buffer A1 (40 mM Tris/HCl, 500 mM NaCl, 10 mM Imidazole, pH  
314 7.4). After exhaustive washing with buffer A2 (40 mM Tris/HCl, 500 mM NaCl, 30 mM  
315 Imidazole, pH 7.4). Bound protein was eluted in a gradient 0-100% of buffer B (40 mM  
316 Tris/HCl, 500 mM NaCl, 500 mM Imidazole, pH 7.4). The fractions containing the  
317 protein of interest were pooled, and the buffer was exchanged with Desalting buffer  
318 (20 mM Tris/HCl, 150 mM NaCl, pH 7.4) in HiPrep™ 26/10 Desalting column (Cytiva).  
319 Protein concentration was determined and an adequate amount of His<sub>6</sub>-SUMO  
320 protease was added. The digestion was performed overnight at 4°C in the presence  
321 of 1 mM DTT and 5% of glycerol. Digestion efficiency was confirmed by SDS-PAGE.  
322 Next, imidazole 1 M pH 8.0 was added to the digestion mix to a final concentration of  
323 20 mM. To deplete His<sub>14</sub>-SUMO-tag and the His<sub>6</sub>-tagged SUMO protease, an  
324 appropriate volume of Protino® NiNTA-Agarose (MACHEREY-NAGEL) slurry was  
325 washed with Desalting buffer. Then, the digestion mix was added to the sedimented  
326 beads and incubated overnight at 4°C with end-to-end mixing. The unbound fraction  
327 was collected by gravity flow, and the bound protein was eluted with equivalent volume  
328 of buffer B. The quality of depletion was assessed by SDS-PAGE.  
329

### 330 **Synthesis of protein-DyLight fluorescent adducts**

331 Purified proteins were reduced with TCEP (Sigma-Aldrich). Excess TCEP was  
332 removed by buffer exchange to Maleimide buffer (100 mM potassium phosphate, 150  
333 mM NaCl, 250 mM sucrose, 1mM EDTA, pH 6.6) in HiPrep™ 26/10 Desalting column  
334 (Cytiva). To fluorescently label the proteins, reduced protein was mixed with a 3:1  
335 molar excess of DyLight<sub>488</sub>/DyLight<sub>680</sub>/DyLight<sub>800</sub>-maleimide (in dimethylformamide)  
336 and incubated overnight at 4°C. Unreacted maleimide groups were quenched with a  
337 50-fold molar excess of cysteine. Finally, the buffer was exchanged to 20 mM HEPES,  
338 150 mM KCl, 5% glycerol, pH 7.4 in HiPrep™ 26/10 Desalting column (Cytiva). The  
339 protein concentration was determined and set to 0.5-1 mg/mL. Aliquots of the labeled  
340 protein were kept at -80°C until used.

341

### 342 **Mitochondrial isolation**

343 Yeast mitochondria were isolated using differential centrifugation (Meisinger et al.,  
344 2006). YP Media (1% yeast extract, 2% peptone) containing 2% glucose (YPD for  
345 primary cultures) or 3% glycerol (YPG for secondary cultures) was used as carbon  
346 source to grow wild-type YPH499 (MATa *ade2-101*, *his3-Δ200*, *leu2-Δ1*, *ura3-52*, *trp1-Δ63*,  
347 *lys2-801*), BY4741 wild-type (MATa *his3Δ1*, *leu2Δ0*, *met15Δ0*, *ura3Δ0*) and  
348 BY4741 *atp21Δ* yeast strains (Euroscarf) at 30°C with shaking till OD<sub>600</sub> reached 1.5-  
349 2.5, after which they were harvested. The pellet was washed with water to remove  
350 remaining media and treated with DTT buffer (10 mM DTT, 100 mM Tris/HCl, pH 9.4)  
351 for 30 min at 30°C with shaking. Cells were washed with 1.2 M Sorbitol and treated  
352 with Zymolase buffer (20 mM KPO<sub>4</sub>, pH 7.4, 1.2 M sorbitol, and 0.57 mg/L zymolase)  
353 for 1 h at 30°C with shaking. Spheroplasts were harvested and resuspended in cold

354 homogenization buffer (600 mM sorbitol, 10 mM Tris/HCl, pH 7.4, 1 g/L BSA, 1 mM  
355 PMSF, and 1 mM EDTA) before lysis using a homogenizer. Mitochondria were  
356 subsequently isolated using differential centrifugation and resuspended in SEM buffer.  
357 Protein concentration in the isolated mitochondria was determined using a Bradford  
358 assay and the final concentration adjusted to 10 mg/ml using SEM (250 mM sucrose,  
359 20 mM MOPS/KOH pH 7.2, 1 mM EDTA) buffer before aliquoting and snap-freezing  
360 for storage at -80°C.

361 Mutant strain *tim44-804* (*MATa*, *ade2-101*, *his3-Δ200*, *leu2-Δ1*, *ura3-52*, *trp1-Δ63*,  
362 *lys2-801*, *tim44::ADE2*, [*pBG-TIM44-0804*]) and the corresponding wild-type cells  
363 were grown under permissive conditions, and mitochondria isolated as described  
364 previously (Hutu *et al* 2008).

365 Mitochondria depleted in Tim50, the AG55Gal strain (*MATa*, *ade2-101*, *his3-Δ200*,  
366 *leu2-Δ1*, *ura3-52*, *trp1-Δ63*, *lys2-801*, *tim50::HIS3-PGAL1-TIM50*) and the  
367 corresponding wild-type cells were grown and processed as described previously  
368 (Schulz *et al*, 2011).

369

### 370 **Import into isolated mitochondria**

371 For the synthesis of [<sup>35</sup>S] labeled Jac1 and Atp5 precursors, mRNA was generated  
372 using the mMessageMachine SP6 transcription kit (Invitrogen), following the  
373 manufacturer's instructions. The mRNA obtained was used for *in vitro* translation in  
374 Flexi Rabbit Reticulocyte Lysate System (Promega) and the resulting lysate was  
375 directly used in the import reaction. The fluorescent precursors, as described above,  
376 were thawed just prior to import.

377 Import reactions were performed as described by (Ryan *et al.*, 2001). Mitochondria  
378 were resuspended in import buffer (250 mM sucrose, 10 mM MOPS/KOH pH 7.2,



379 80 mM KCl, 2 mM KH<sub>2</sub>PO<sub>4</sub>, 5 mM MgCl<sub>2</sub>, 5 mM methionine, and 3% fatty acid-free  
380 BSA) and supplemented with 2 mM ATP and 2 mM NADH (as well as 5 mM Creatine  
381 phosphate and 1 μg/μl Creatine kinase for experiments where the time for import  
382 exceeded 15 minutes). Import was performed by incubating samples at 25°C and  
383 stopped by the addition of 1% AVO (final concentration 1 μM valinomycin, 8 μM  
384 antimycin A and 20 μM oligomycin). The import samples were treated with 20 μg/ml  
385 proteinase K (PK) for 10 min on ice. Samples were treated with 2 mM PMSF,  
386 incubated on ice for 10 min, and centrifuged to sediment the mitochondria which were  
387 washed with SEM buffer and then analyzed by SDS-PAGE followed by western  
388 blotting and digital autoradiography (Amersham Typhoon, Cytiva) or fluorescent  
389 scanning (Starion FLA-9000, FujiFilm), based on the imported precursor. Signals were  
390 quantified using ImageQuant LT (GE Healthcare) with a rolling ball background  
391 quantification. Alternatively, for the 96-well format, the mitochondria were centrifuged  
392 after proteinase K and PMSF treatment, washed with SEM, resuspended in SEM  
393 buffer for transfer to a 96-well plate, and read on the Spark Multimode Microplate  
394 Reader (Tecan). Values of import were normalized by subtracting the signal from the  
395 AVO control sample and graphically represented using GraphPad Prism 8.

396 Mitochondria isolated from *tim44* temperature-conditional yeast mutant were  
397 incubated at 37°C for 15 minutes in import buffer prior to the addition of ATP, NADH  
398 and the precursor.

399

#### 400 **Quantification of imported protein**

401 Purified proteins were diluted in desalting buffer. A standard curve was plotted upon  
402 fluorescence measurement. This standard curve was used to calculate the  
403 corresponding total protein amount in the import samples.

404 **Membrane potential reduction – CCCP titration**

405 Increasing amounts of the uncoupler CCCP were titrated into the import reaction to  
406 reduce the membrane potential (van der Laan et al., 2006). Import buffer used for the  
407 import reaction (as described above) was supplemented with 1% fatty acid-free BSA  
408 and 20  $\mu$ M oligomycin. Mitochondria were kept at 25°C for 5 min prior to precursor  
409 addition.

410

411 **Acknowledgements**

412 Funded by the Deutsche Forschungsgemeinschaft (DFG, German Research  
413 Foundation) under Germany's Excellence Strategy - EXC 2067/1- 390729940;  
414 SFB1190 (projects P13, PR); SFB860 (B01, PR); the Max Planck Society (PR), and  
415 the PhD program Molecular Biology – International Max Planck Research School and  
416 the Göttingen Graduate School for Neurosciences and Molecular Biosciences (GGNB;  
417 DFG grant GSC 226/1) (RG, NJ).

418

419 **Author Contributions**

420 NJ, RG, PR and LDCZ developed the concept and design of the study. NJ, RG, OB  
421 and LDCZ performed the experiments and analyzed the data. NJ, PR, and LDCZ wrote  
422 the original draft. NJ, RG, PR, and LDCZ reviewed and edited the final draft of the  
423 manuscript. PR and LDCZ provided supervision.

424

425 **Declaration of Interests**

426 The authors declare that they have no conflict of interest.

427

428 **Figure legends**

429 **Figure 1. Import of fluorescent precursor into mitochondria.**

430 A. Schematic presentation of the modified Jac1 protein with C-terminal cysteine for  
431 fluorophore addition.

432 B. Jac1<sub>488</sub> was imported into purified mitochondria for indicated times and treated  
433 with Proteinase K (PK) or left untreated as indicated, Prec., purified precursor  
434 protein; p, precursor; m, mature protein;  $\Delta\Psi$ , membrane potential.

435 C. Jac1<sub>488</sub> import into mitochondria as in B, right side; Jac1<sub>488</sub> protein dilution series,  
436 left side.

437 D. Quantification of import of Jac1<sub>488</sub> (maximal signal at 15 min import time, 100%);  
438 error bars indicate standard error of mean (SEM) (n=3).

439 E. Quantification of absolute imported amounts in picomoles Jac1<sub>488</sub> per  $\mu\text{g}$  of  
440 mitochondria; error bars indicate SEM (n=3).

441

442 **Figure 2. Import into mutant mitochondria.**

443 A. Steady state protein levels in wild-type (WT) and Tim50-depleted mitochondria  
444 visualized by Western blotting and immunodetection with indicated antisera.

445 B. Jac1<sub>488</sub> was imported into wild-type (WT) and Tim50-depleted mitochondria for  
446 indicated times and samples were treated with Proteinase K. p, precursor

447 C. Quantification of Jac1<sub>488</sub> import into wild-type (WT) and Tim50-depleted  
448 mitochondria. The amount of imported protease-protected protein in WT  
449 mitochondria at 15 min was set to 100%; error bars indicate SEM (n=3).

450 D. [<sup>35</sup>S]Jac1 was imported into wild-type (WT) and Tim50-depleted mitochondria for  
451 indicated times and samples were treated with Proteinase K. p, precursor; m, mature.

452 E. Quantification of [<sup>35</sup>S]Jac1 import into wild-type (WT) and Tim50-depleted  
453 mitochondria. The amount of imported protease-protected protein in WT  
454 mitochondria at 15 min was set to 100%; error bars indicate SEM (n=3).

455 F. Steady state protein levels in wild-type (WT) and *tim44-804* mitochondria  
456 visualized by Western blotting and immunodetection with indicated antisera.

457 G. Jac1<sub>488</sub> was imported into wild-type (WT) and *tim44-804* mitochondria for indicated  
458 times and samples were treated with Proteinase K. p, precursor; m, mature.

459 H. Quantification of Jac1<sub>488</sub> import into wild-type (WT) and *tim44-804* mitochondria.  
460 The amount of imported protease-protected protein in WT mitochondria at 15 min was  
461 set to 100%; error bars indicate SEM (n=3).

462 I. [<sup>35</sup>S]Jac1 was imported into wild-type (WT) and *tim44-804* mitochondria for indicated  
463 times and samples were treated with Proteinase K. p, precursor; m, mature.

464 J. Quantification of [<sup>35</sup>S]Jac1 import into wild-type (WT) and *tim44-804* mitochondria.  
465 The amount of imported protease-protected protein in WT mitochondria at 15 min was  
466 set to 100%; error bars indicate SEM (n=3).

467

468 **Figure 3. Import of precursor variants into mitochondria.**

469 A. Schematic presentation of pAmJac1 and plmJac1, with presequences derived  
470 from Aco1 and Idh1, respectively, fused to the N-terminus of the mature Jac1  
471 portion.

472 B. Purified pAmJac1 was conjugated with different fluorophores as indicated.  
473 Detected without bleed through under fluorescence imaging conditions.

474 C. Jac1<sub>488</sub> and pAmJac1 conjugated to DyLight 488, 680, and 800 were imported  
475 into wild-type mitochondria for indicated times and samples were treated with  
476 Proteinase K. Prec., purified precursor protein; p, precursor; m, mature.

477 D. Quantification Jac1<sub>488</sub> and pAmJac1 conjugated to DyLight 488, 680, and 800  
478 import into wild-type (WT). The amount of imported protease-protected samples at  
479 30 min was set to 100%; error bars indicate SEM (n=3).

480 E. Jac1<sub>488</sub> and plmJac1 conjugated to DyLight 488, 680 and 800 were imported into  
481 wild-type mitochondria for indicated times and samples treated with Proteinase K.  
482 Prec., purified precursor protein; p, precursor; m, mature

483 F. Quantification Jac1<sub>488</sub> and plmJac1 conjugated to DyLight 488, 680 and 800  
484 import into wild-type (WT). The amount of imported protease-protected samples at  
485 30 min was set to 100%; error bars indicate SEM (n=3).

486

487 **Figure 4. Analyzing import in a multi well plate format.**

488 A. Workflow for transfer of imported samples into 96-well plate for readout.

489 B. Standard curve depicting fluorescence signal plotted against concentration of  
490 pAmJac1<sub>680</sub> dilutions.

491 C. Import of pAmJac1<sub>680</sub> into wild-type mitochondria. After import and proteinase K  
492 treatment fluorescence was measured in 96-well format. The amount of imported  
493 protease-protected samples at 15 min was set to 100%; error bars indicate SEM (n=8).

494 D. Quantification of picomoles of pAmJac1<sub>680</sub> imported per  $\mu$ g mitochondria as  
495 assessed in 96-well format; error bars indicate SEM (n=8).

496 E. pAmJac1<sub>680</sub> was imported into purified mitochondria and samples analyzed by  
497 SDS-PAGE or in 96-well format. The amount of imported, protease-protected  
498 samples at 15 min was set to 100% in each case; error bars indicate SEM (n=8 for  
499 96-well plate analysis, n=3 for SDS-PAGE).

500 F. Comparison of absolute import of pAmJac1<sub>680</sub> into wild-type mitochondria  
501 quantified from 96-well format and SDS-PAGE. Error bars indicate SEM (n=8 for 96-  
502 well plate analysis, n=3 for SDS-PAGE).

503

504 G. pAmJac1<sub>680</sub> was imported into wild-type (WT) and Tim50-depleted mitochondria  
505 for indicated times and samples treated with proteinase K. Samples were analyzed  
506 in 96-well format and by SDS-PAGE. The amount of imported protease-protected  
507 protein in WT mitochondria at 15 min was set to 100%; error bars indicate SEM (n=5  
508 for 96-well plate analysis, n=4 for SDS-PAGE).

509

510 **Figure 5. Fluorescence based protein assembly.**

511 A. Atp5<sub>488</sub> (left panel) or [<sup>35</sup>S]Atp5 (right panel) were imported into mitochondria for  
512 indicated times and in the presence or absence of a membrane potential ( $\Delta\Psi$ ). After  
513 proteinase K treatment, samples were separated by SDS-Page and analyzed by  
514 fluorescence scanning or digital autoradiography. Prec., purified precursor protein; p,  
515 precursor; m, mature protein.

516 B. Import of Atp5<sub>488</sub> with increasing concentrations of CCCP to study dependency of  
517 import on membrane potential ( $\Delta\Psi$ ). P, precursor; m, mature protein.

518 C. Comparison of import of Atp5<sub>488</sub> with increasing CCCP concentrations quantified  
519 from 96-well format and SDS-PAGE. The amount of imported protease-protected  
520 samples in the absence of CCCP was set to 100%; error bars indicate SEM (n=4 for  
521 96-well plate analysis, n=2 for SDS-PAGE).

522 D. [<sup>35</sup>S]Atp5 was imported with increasing CCCP concentrations as described in B.  
523 Samples were separated by SDS-PAGE and analyzed by digital autoradiography.

524 E. Quantification of import of [<sup>35</sup>S]Atp5 with increasing CCCP concentrations. The  
525 amount of imported protease-protected protein in the absence of CCCP was set to  
526 100%; error bars indicate SEM (n=3).

527 F. BN-PAGE steady state analysis of complex V, complex IV, and TOM in  
528 mitochondria isolated from WT and *atp21* $\Delta$  yeast strains.

529 G. Atp5<sub>488</sub> (left panel) or [<sup>35</sup>S]Atp5 (right panel) were imported into wild-type and  
530 *atp21* $\Delta$  mitochondria for indicated times and in the presence or absence of a



531 membrane potential ( $\Delta\Psi$ ). After proteinase K treatment, samples were solubilized in  
532 digitonin buffer and separated by BN-Page. Aliquots of the samples was analyzed by  
533 SDS-PAGE (lower panels). Subsequently proteins were visualized by fluorescence  
534 scanning or digital autoradiography. Complex V dimer, ( $CV_D$ ); monomeric ( $CV_M$ ).  
535 Prec., purified precursor ; p, precursor; m, mature protein.

536

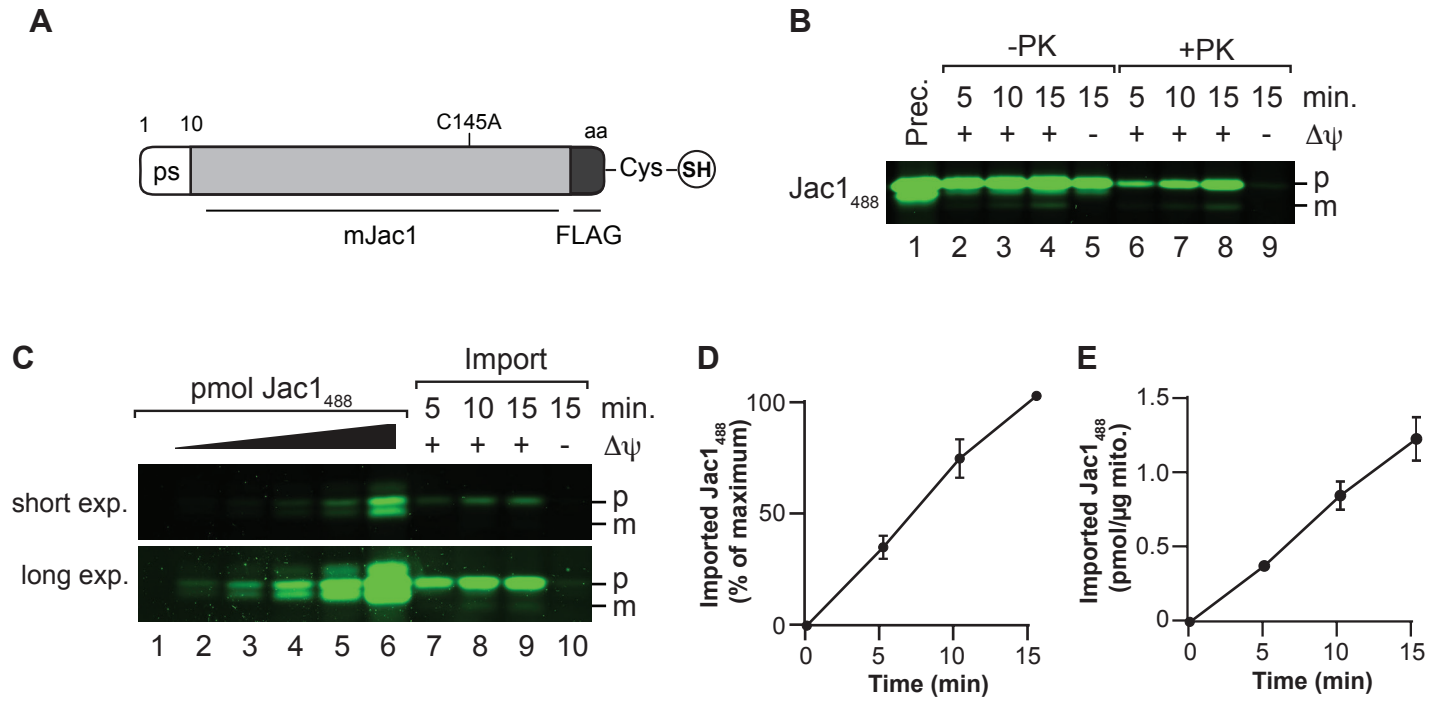

FIGURE 1

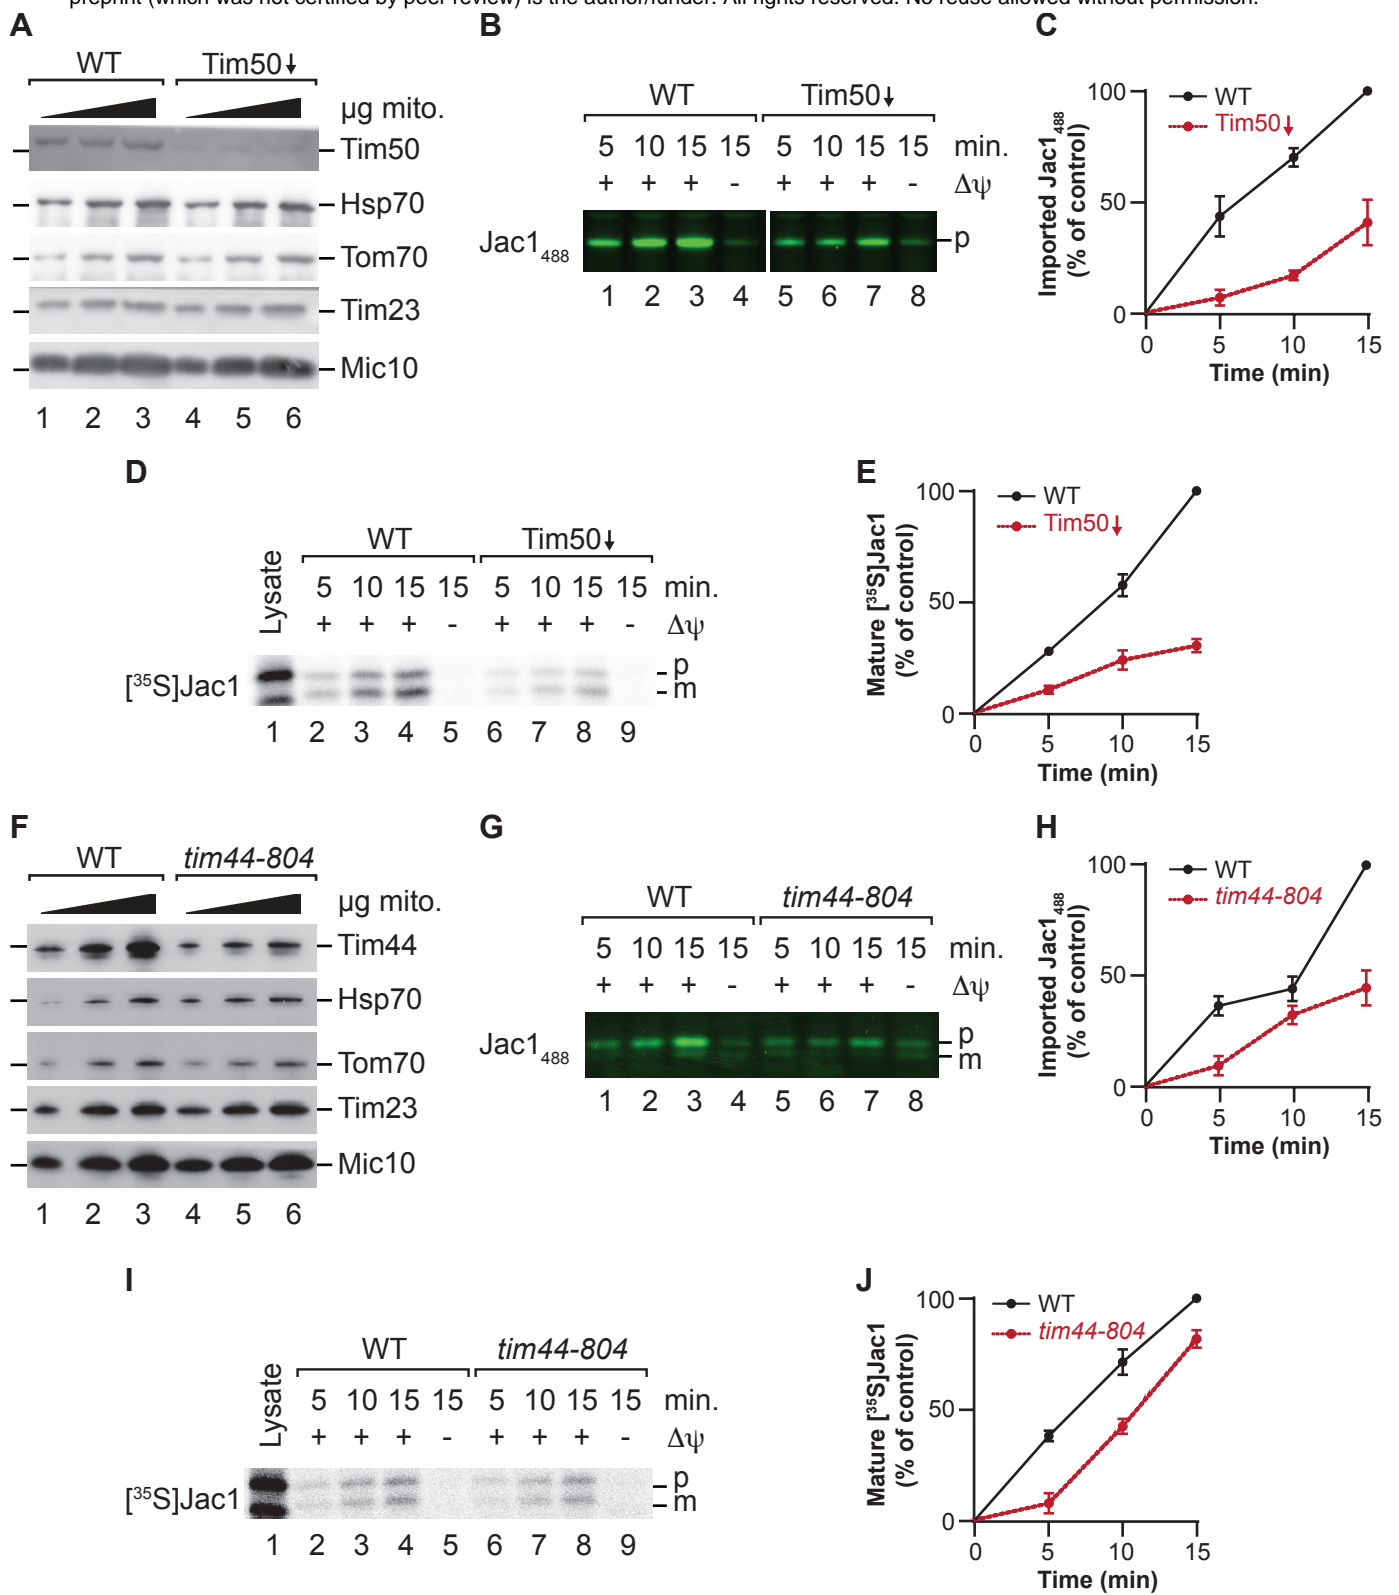

FIGURE 2

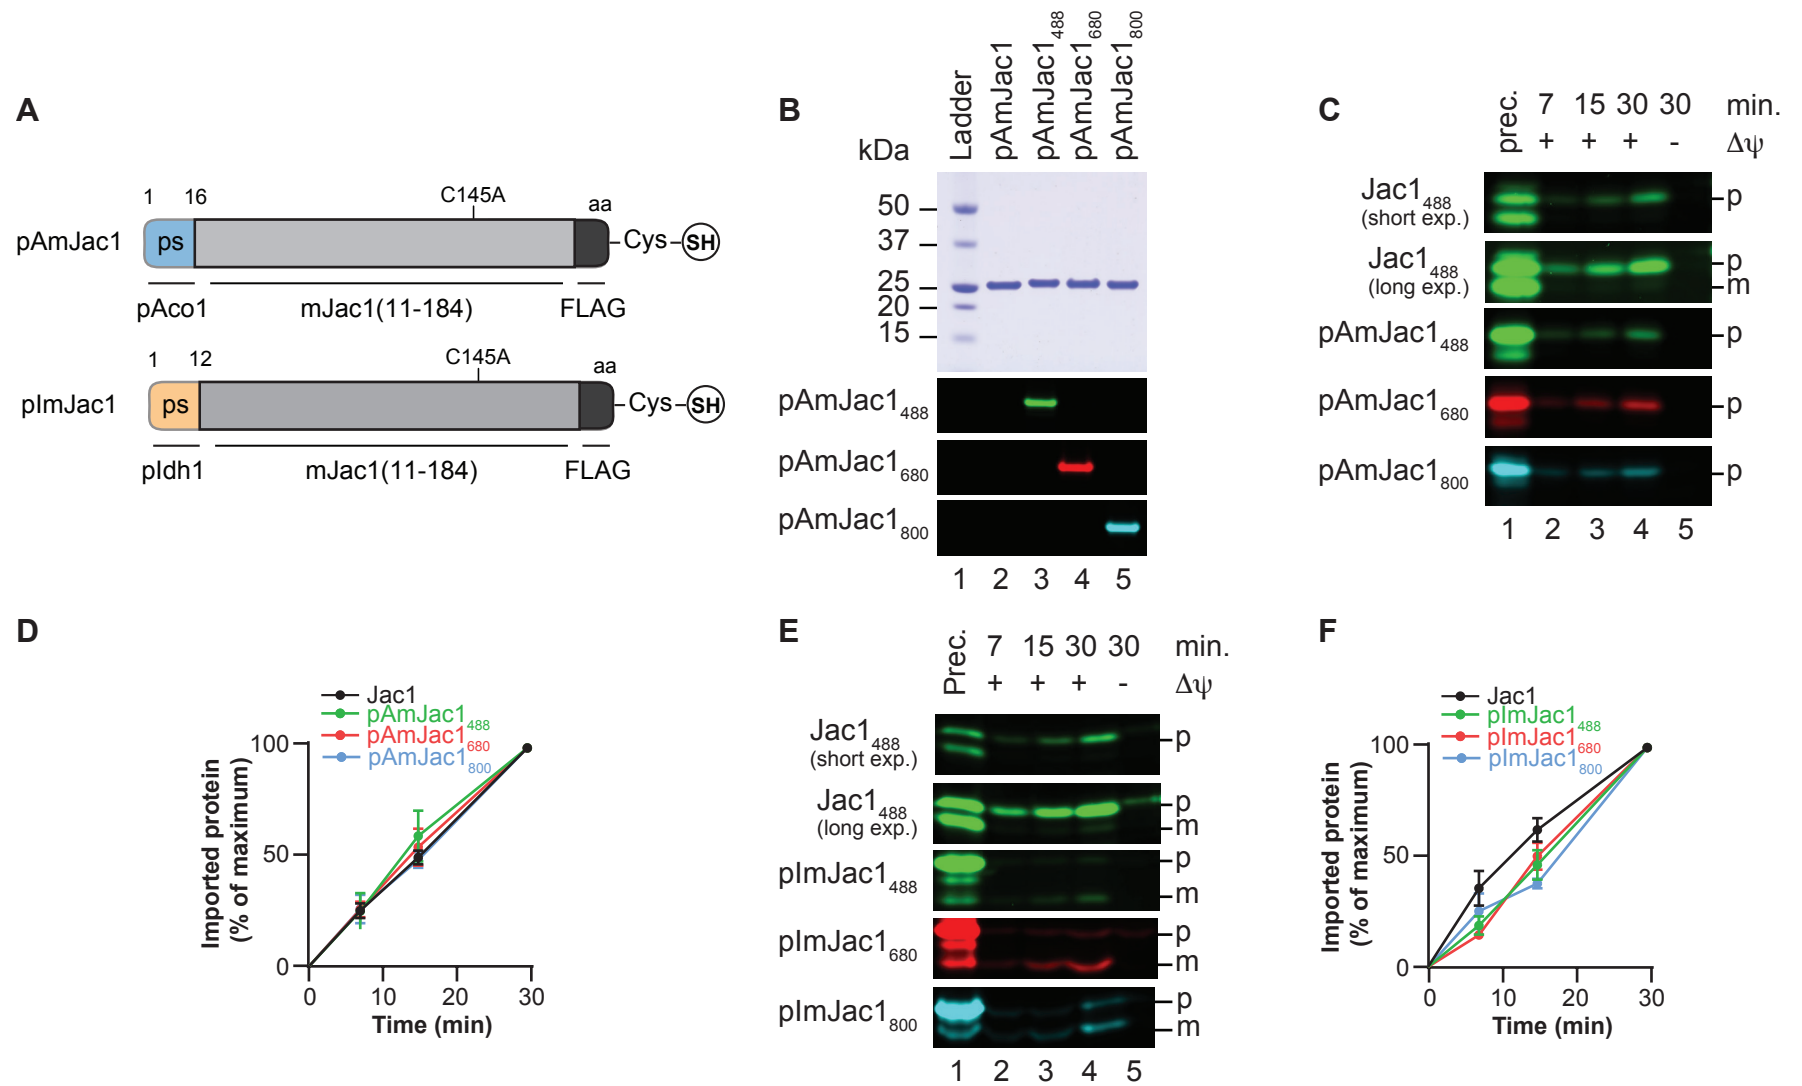

FIGURE 3

**A**

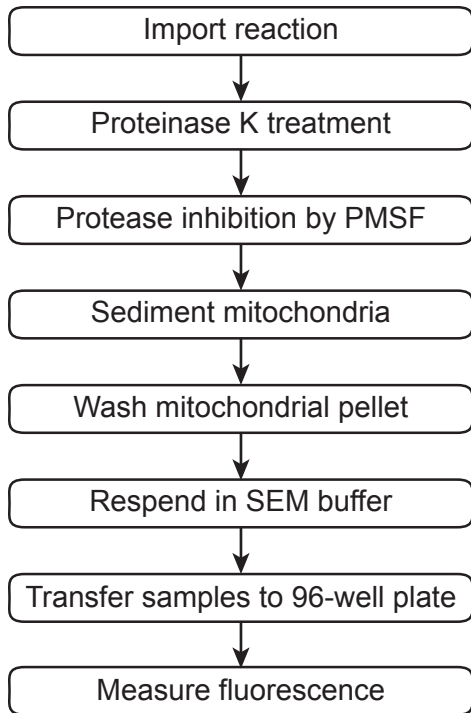

**B**

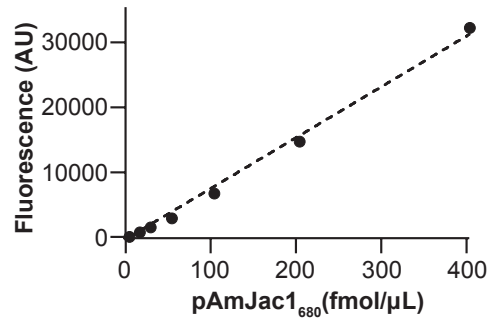

**C**

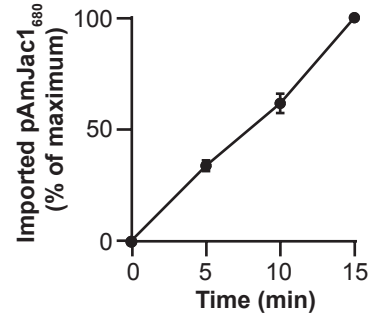

**D**

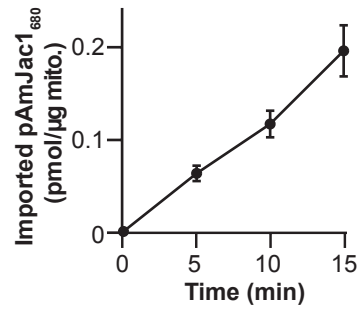

**E**

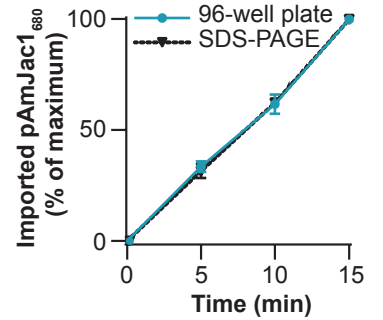

**F**

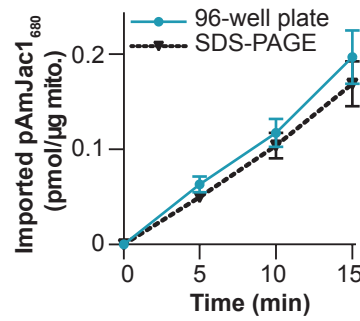

**G**

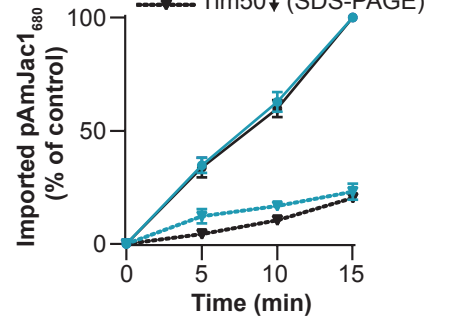

FIGURE 4

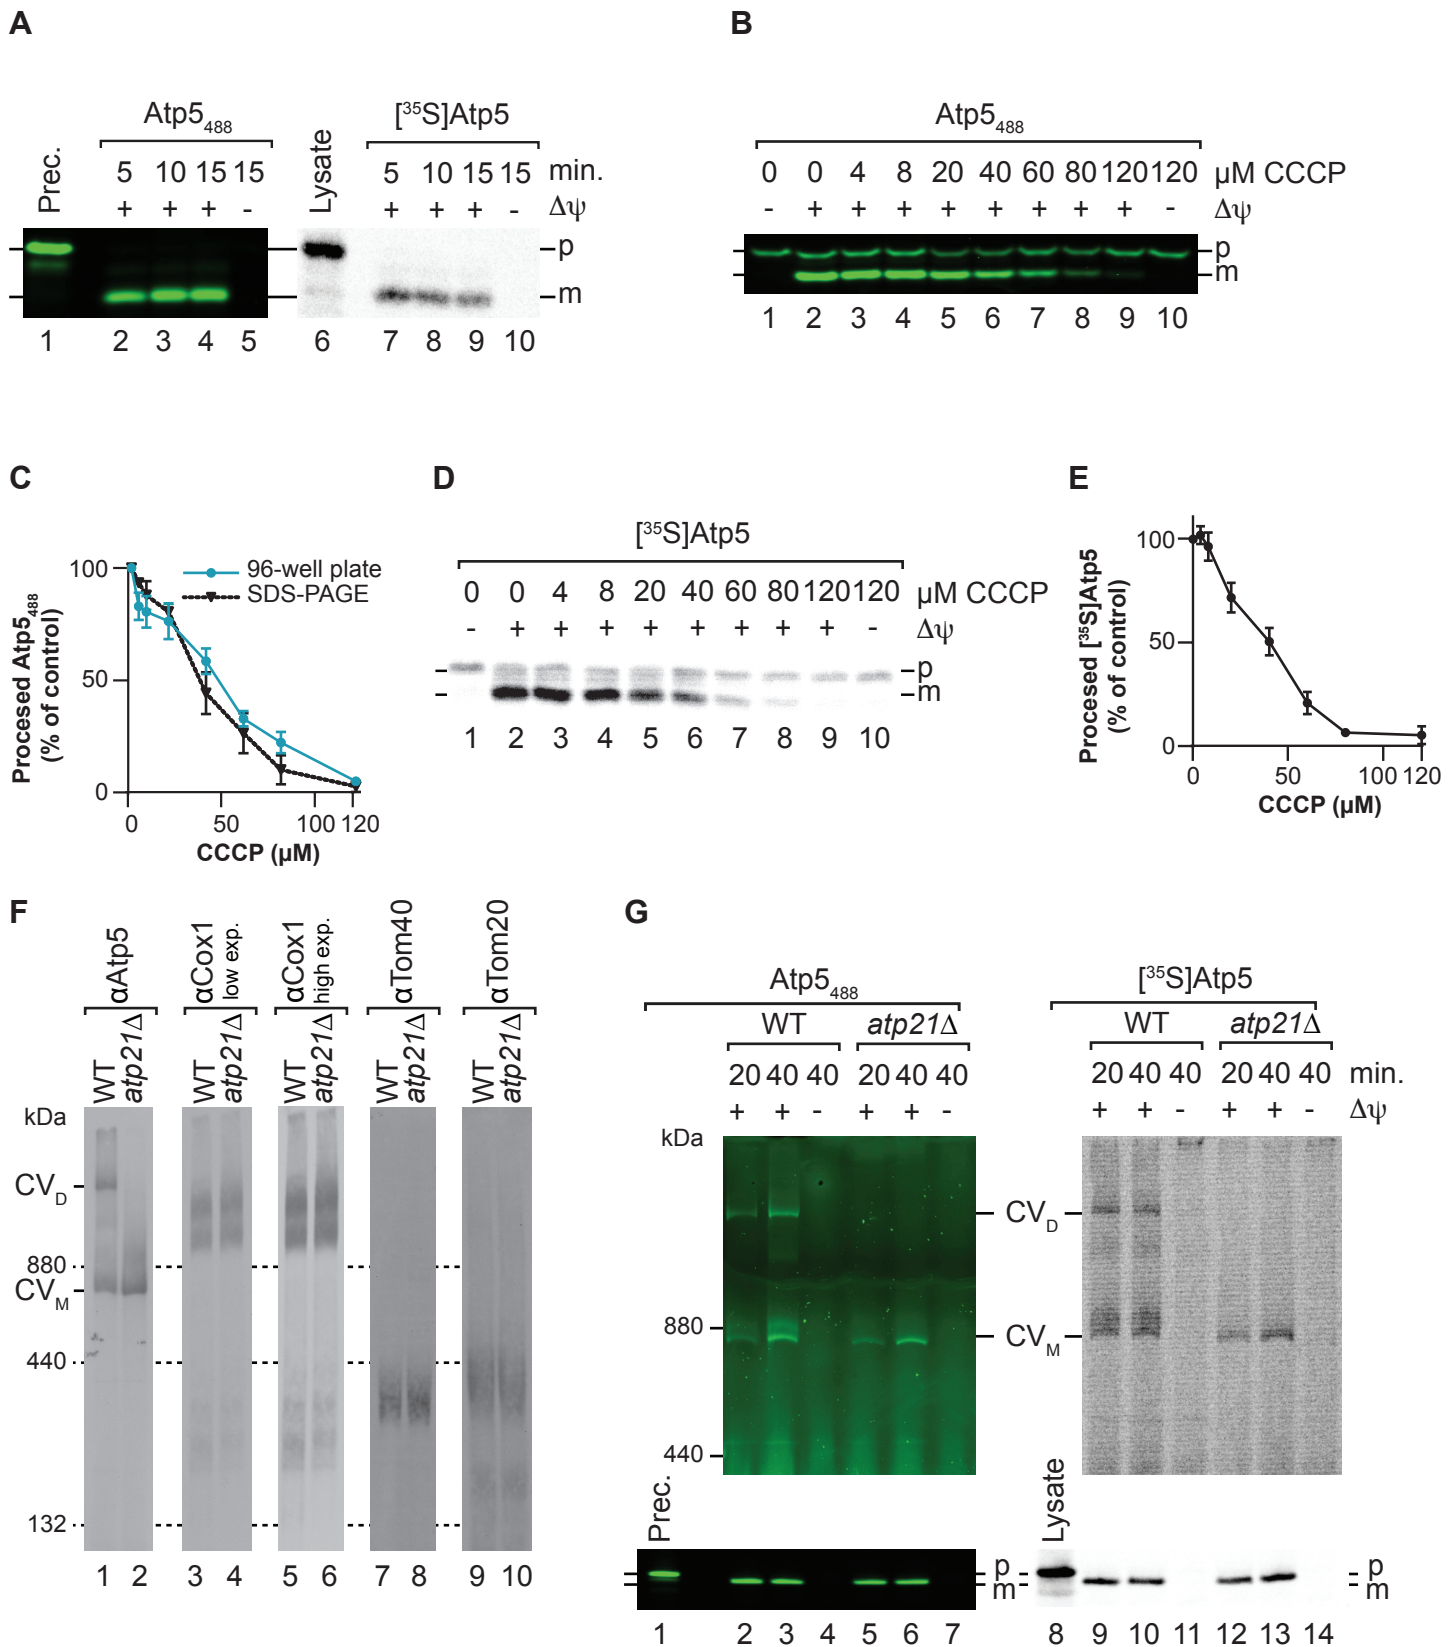

FIGURE 5

537 **References**

- 538 Araiso Y, Imai K & Endo T (2022) Role of the TOM Complex in Protein Import into  
539 Mitochondria: Structural Views. *Annu Rev Biochem* 91
- 540 Di Bartolomeo F, Malina C, Campbell K, Mormino M, Fuchs J, Vorontsov E,  
541 Gustafsson CM & Nielsen J (2020) Absolute yeast mitochondrial proteome  
542 quantification reveals trade-off between biosynthesis and energy generation  
543 during diauxic shift. *Proc Natl Acad Sci U S A* 117: 7524–7535
- 544 Berthold J, Bauer MF, Schneider HC, Klaus C, Dietmeier K, Neupert W & Brunner M  
545 (1995) The MIM complex mediates preprotein translocation across the  
546 mitochondrial inner membrane and couples it to the mt-Hsp70/ATP driving  
547 system. *Cell* 81: 1085–1093
- 548 Blom J, Kubrich M, Rassow J, Voos W, Dekker PJT, Maarse AC, Meijer M, Pfanner2  
549 N, Maarse JC, Blom LA, *et al* (1993) The essential yeast protein MIM44  
550 (encoded by MPI1) is involved in an early step of preprotein translocation across  
551 the mitochondrial inner membrane. *Mol Cell Biol* 13: 7364–7371
- 552 Brix J, Dietmeier K & Pfanner N (1997) Differential Recognition of Preproteins by the  
553 Purified Cytosolic Domains of the Mitochondrial Import Receptors Tom20,  
554 Tom22, and Tom70\*.
- 555 Chacinska A, Koehler CM, Milenkovic D, Lithgow T & Pfanner N (2009) Importing  
556 Mitochondrial Proteins: Machineries and Mechanisms. *Cell* 138: 628
- 557 CHurt E, Muller U & Schatz Biocenter G (1985) The first twelve amino acids of a  
558 yeast mitochondrial outer membrane protein can direct a nuclear-encoded  
559 cytochrome oxidase subunit to the mitochondrial inner membrane. *EMBO J* 4:  
560 3509–3518
- 561 Cruz-Zaragoza LD, Dennerlein S, Linden A, Yousefi R, Lavdovskaia E, Aich A, Falk  
562 RR, Gomkale R, Schöndorf T, Bohnsack MT, *et al* (2021) An in vitro system to  
563 silence mitochondrial gene expression. *Cell* 184: 5824-5837.e15
- 564 Geissler A, Chacinska A, Truscott KN, Wiedemann N, Brandner K, Sickmann A,  
565 Meyer HE, Meisinger C, Pfanner N & Rehling P (2002) The Mitochondrial  
566 Presequence Translocase: An Essential Role of Tim50 in Directing Preproteins  
567 to the Import Channel. *Cell* 111: 507–518

- 568 Harmey MA, Hallermayer G, Korb H & Neupert W (1977) Transport of  
569 cytoplasmically synthesized proteins into the mitochondria in a cell free system  
570 from *Neurospora crassa*. *Eur J Biochem* 81: 533–544
- 571 Hutu DP, Guiard B, Chacinska A, Becker D, Pfanner N, Rehling P & Van Der Laan M  
572 (2008) Mitochondrial protein import motor: Differential role of Tim44 in the  
573 recruitment of Pam17 and J-complex to the presequence translocase. *Mol Biol*  
574 *Cell* 19: 2642–2649
- 575 van der Laan M, Wiedemann N, Mick DU, Guiard B, Rehling P & Pfanner N (2006) A  
576 Role for Tim21 in Membrane-Potential-Dependent Preprotein Sorting in  
577 Mitochondria. *Curr Biol* 16: 2271–2276
- 578 Lill R & Neupert W (1996) Mechanisms of protein import across the mitochondrial  
579 outer membrane. *Trends Cell Biol* 6: 56–61
- 580 Maccacchini ML, Rudin Y, Blobel G & Schatz G (1979) Import of proteins into  
581 mitochondria: precursor forms of the extramitochondrially made F1-ATPase  
582 subunits in yeast. *Proc Natl Acad Sci U S A* 76: 343–347
- 583 Martin J, Mahlke K & Pfanners N (1991) Role of an energized inner membrane in  
584 mitochondrial protein import. Delta psi drives the movement of presequences.  
585 *rNE J Biol Chem cc*) 266: 18051–18057
- 586 Meisinger C, Pfanner N & Truscott KN (2006) Isolation of yeast mitochondria.  
587 *Methods Mol Biol* 313: 33–39
- 588 Mokranjac D, Paschen SA, Kozany C, Prokisch H, Hoppins SC, Nargang FE,  
589 Neupert W & Hell K (2003) Tim50, a novel component of the TIM23 preprotein  
590 translocase of mitochondria. *EMBO J* 22: 816–825
- 591 Mokranjac D, Sichtung M, Popov-Čeleketić D, Berg A, Hell K & Neupert W (2005)  
592 The Import Motor of the Yeast Mitochondrial TIM23 Preprotein Translocase  
593 Contains Two Different J Proteins, Tim14 and Mdj2. *J Biol Chem* 280: 31608–  
594 31614
- 595 Morgenstern M, Stiller SB, Lübbert P, Peikert CD, Dannenmaier S, Drepper F, Weill  
596 U, Höß P, Feuerstein R, Gebert M, *et al* (2017) Definition of a High-Confidence  
597 Mitochondrial Proteome at Quantitative Scale. *Cell Rep* 19: 2836–2852
- 598 Mossmann D, Meisinger C & Vögtle FN (2012) Processing of mitochondrial



- 599 presequences. *Biochim Biophys Acta - Gene Regul Mech* 1819: 1098–1106
- 600 Neupert W & Herrmann JM (2007) Translocation of proteins into mitochondria. *Annu*  
601 *Rev Biochem* 76: 723–749 doi:10.1146/annurev.biochem.76.052705.163409  
602 [PREPRINT]
- 603 Nunnari J & Suomalainen A (2012) Mitochondria: In sickness and in health. *Cell* 148  
604 doi:10.1016/j.cell.2012.02.035 [PREPRINT]
- 605 Pereira GC, Allen WJ, Watkins DW, Buddrus L, Noone D, Liu X, Richardson AP,  
606 Chacinska A & Collinson I (2019) A High-Resolution Luminescent Assay for  
607 Rapid and Continuous Monitoring of Protein Translocation across Biological  
608 Membranes. *J Mol Biol* 431: 1689
- 609 Pfanner N, Warscheid B & Wiedemann N (2019) Mitochondrial proteins: from  
610 biogenesis to functional networks. *Nat Rev Mol Cell Biol* 20: 267–284
- 611 Qian X, Gebert M, Höpker J, Yan M, Li J, Wiedemann N, Van Der Laan M, Pfanner  
612 N & Sha B (2011) Structural basis for the function of Tim50 in the mitochondrial  
613 presequence translocase. *J Mol Biol* 411: 513–519
- 614 Richter-Dennerlein R, Dennerlein S & Rehling P (2015) Integrating mitochondrial  
615 translation into the cellular context. *Nat Rev Mol Cell Biol* 16: 586–592
- 616 Roise D, Horvath SJ, Tomich JM, Richards JH & Schatz G (1986) A chemically  
617 synthesized pre-sequence of an imported mitochondrial protein can form an  
618 amphiphilic helix and perturb natural and artificial phospholipid bilayers. *EMBO J*  
619 5: 1327–1334
- 620 Ryan MT, Voos W & Pfanner N (2001) Assaying protein import into Mitochondria.  
621 *Methods Cell Biol*: 189–215
- 622 Schneider HC, Berthold J, Bauer MF, Dietmeier K, Guiard B, Brunner M & Neupert  
623 W (1994) Mitochondrial Hsp70/MIM44 complex facilitates protein import. *Nat*  
624 1994 3716500 371: 768–774
- 625 Schulz C, Lytovchenko O, Melin J, Chacinska A, Guiard B, Neumann P, Ficner R,  
626 Jahn O, Schmidt B & Rehling P (2011) Tim50's presequence receptor domain is  
627 essential for signal driven transport across the TIM23 complex. *J Cell Biol* 195:  
628 643
- 629 Schulz C & Rehling P (2014) Remodelling of the active presequence translocase

- 630 drives motor-dependent mitochondrial protein translocation. *Nat Commun* 2014  
631 51 5: 1–9
- 632 Schulz C, Schendzielorz A & Rehling P (2015) Unlocking the presequence import  
633 pathway. *Trends Cell Biol* 25: 265–275
- 634 Sickmann A, Reinders J, Wagner Y, Joppich C, Zahedi R, Meyer HE, Schönfisch B,  
635 Perschil I, Chacinska A, Guiard B, *et al* (2003) The proteome of *Saccharomyces*  
636 *cerevisiae* mitochondria. *Proc Natl Acad Sci U S A* 100: 13207–13212
- 637 Vögtle FN, Wortelkamp S, Zahedi RP, Becker D, Leidhold C, Gevaert K, Kellermann  
638 J, Voos W, Sickmann A, Pfanner N, *et al* (2009) Global analysis of the  
639 mitochondrial N-proteome identifies a processing peptidase critical for protein  
640 stability. *Cell* 139: 428–439
- 641 Voos W, Gambill BD, Guiard B, Pfanner N & Craig EA (1993) Presequence and  
642 mature part of preproteins strongly influence the dependence of mitochondrial  
643 protein import on heat shock protein 70 in the matrix. *J Cell Biol* 123: 119–126
- 644 Wiedemann N & Pfanner N (2017) Mitochondrial machineries for protein import and  
645 assembly. *Annu Rev Biochem* 86: 685–714
- 646 Yamamoto H, Esaki M, Kanamori T, Tamura Y, Nishikawa S ichi & Endo T (2002)  
647 Tim50 is a subunit of the TIM23 complex that links protein translocation across  
648 the outer and inner mitochondrial membranes. *Cell* 111: 519–528
- 649 Yamamoto H, Fukui K, Takahashi H, Kitamura S, Shiota T, Terao K, Uchida M,  
650 Esaki M, Nishikawa S-I, Yoshihisa T, *et al* (2009) Roles of Tom70 in Import of  
651 Presequence-containing Mitochondrial Proteins \* □ S.
- 652 Yamano K, Yatsukawa Y-I, Esaki M, Aiken Hobbs AE, Jensen RE & Endo T (2007)  
653 Tom20 and Tom22 Share the Common Signal Recognition Pathway in  
654 Mitochondrial Protein Import \*.
- 655
